# Supplementary material for: Cancer cachexia reduces the efficacy of immune checkpoint inhibitors in cancer patients
Source: publisher site journal article supplement (doi:10.18632/aging.205652), 2024-03-11
Supplement: Supplementary file [file aging-v16i6-205652-supplementary-material-SD1.pdf]

**SUPPLEMENTARY FIGURES**

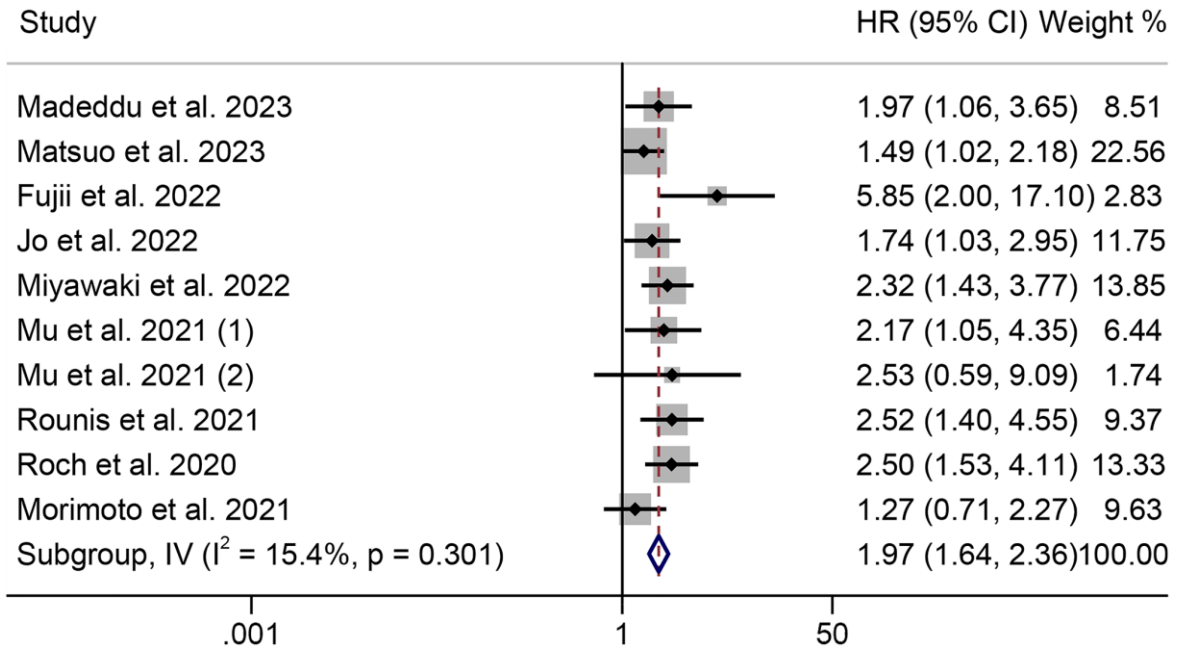

**Supplementary Figure 1. Forest plots of the relationship between cachexia and overall survival in NSCLC patients.** Abbreviations: HR: hazard ratio; CI: confidence interval; IV: Inverse Variance method.

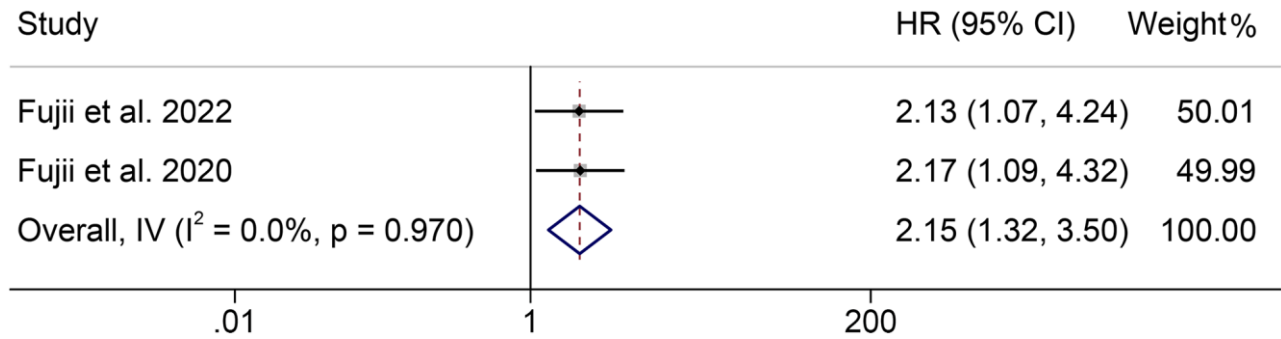

**Supplementary Figure 2. Forest plots of the relationship between cachexia and time to treatment failure.** Abbreviations: HR: hazard ratio; CI: confidence interval.

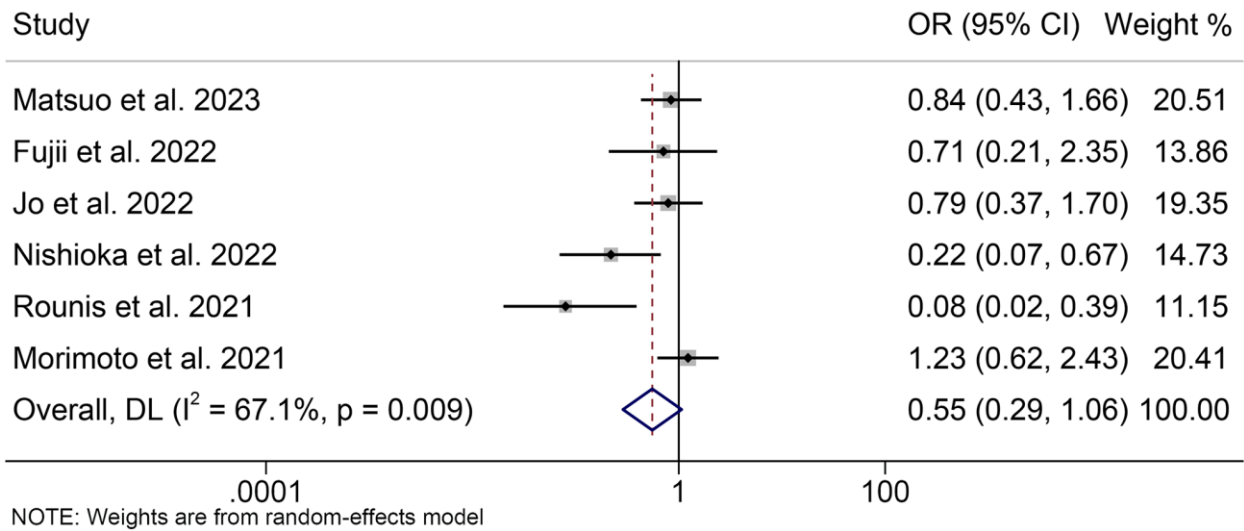

**Supplementary Figure 3. Forest plots of the relationship between cachexia and objective response rate in NSCLC patients.** Abbreviations: OR: odds ratio; CI: confidence interval; IV: Inverse Variance method.

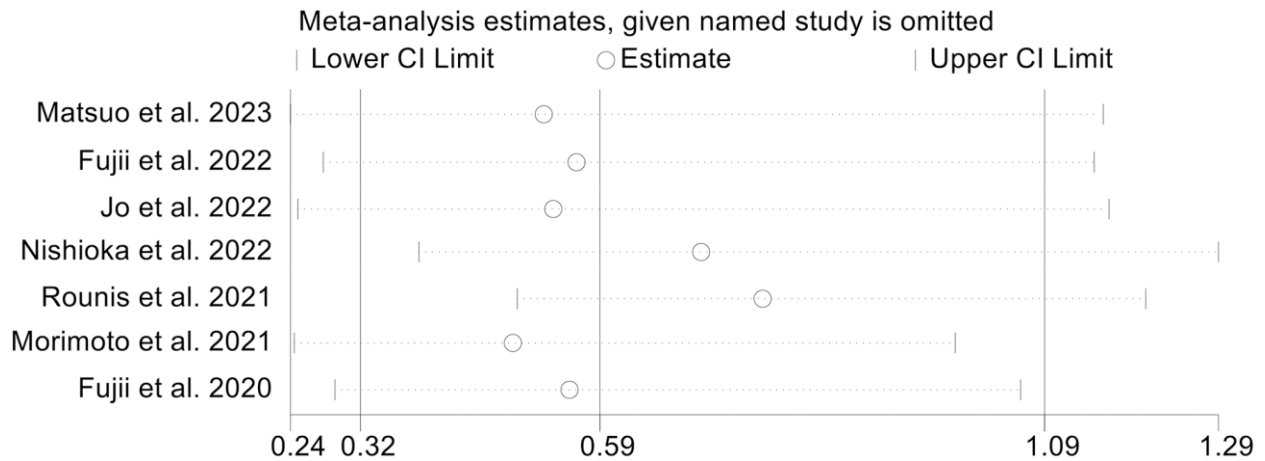

**Supplementary Figure 4. Sensitivity analysis of the association between cachexia and objective response rate.** Abbreviations: HR: hazard ratio; CI: confidence interval.

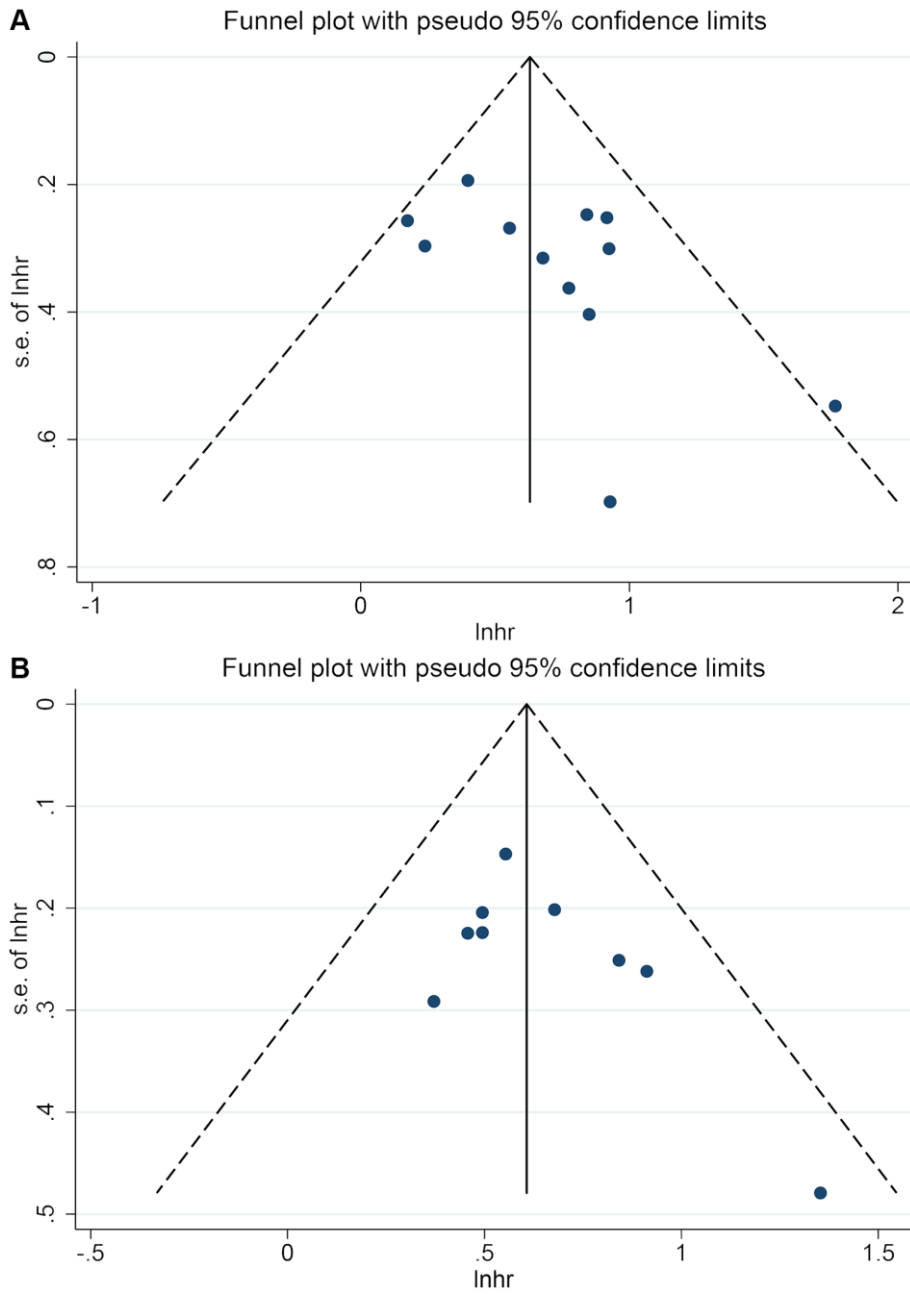

**Supplementary Figure 5.** Funnel plots of the relationship between cachexia and overall survival (A) and progression-free survival (B). Abbreviations: HR: hazard ratio; DL: DerSimonian-Laird method.
